# Supplementary material for: Left Atrial Remodeling after Mitral Valve Repair for Primary Mitral Regurgitation: Evolution over Time and Prognostic Significance
Source: MDPI journal article supplement (doi:10.3390/jcdd9070230), 2022-07-18
Supplement: s1 [file s1]

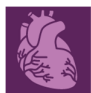

Supplementary Materials

## Left Atrial Remodeling after Mitral Valve Repair for Primary Mitral Regurgitation: Evolution over Time and Prognostic Significance

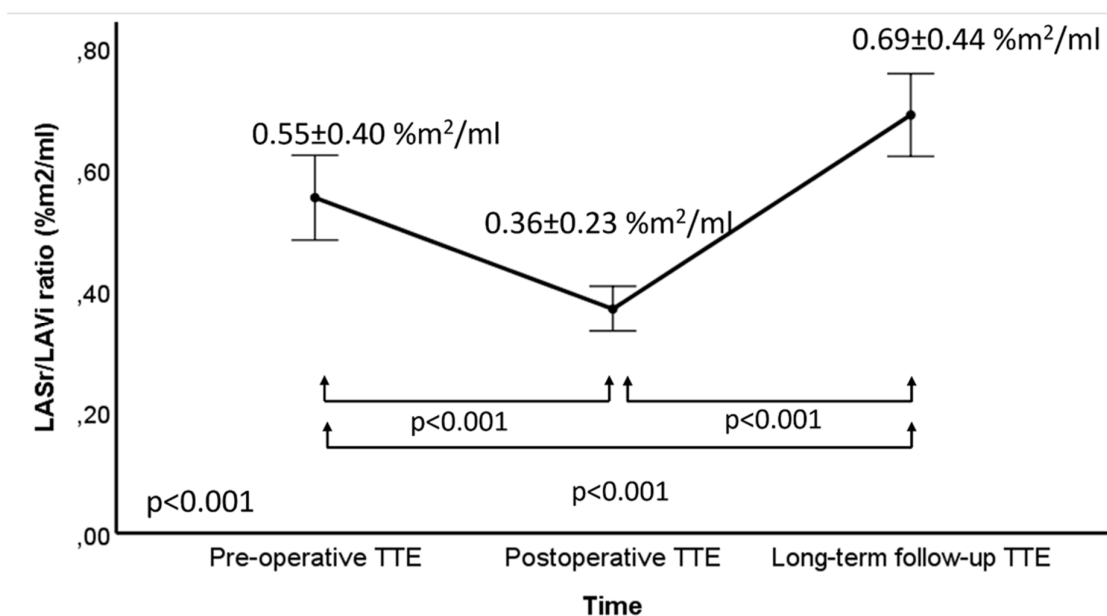

**Figure S1.** Changes in left atrial reservoir strain over time, corrected for left atrial volume.

This panel shows the changes in LASr, corrected for LAVi from baseline to postoperative -and long-term follow-up.

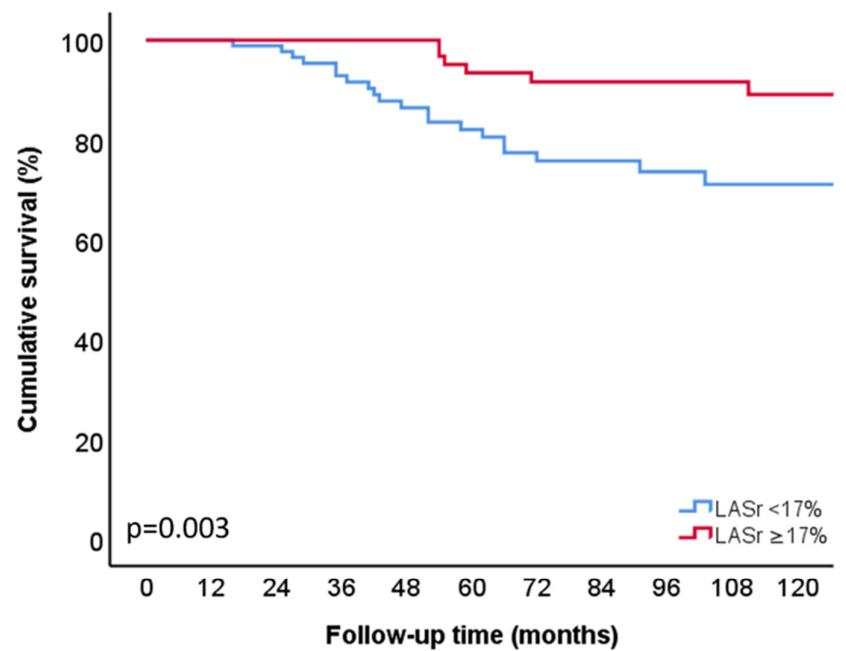

| Number at risk |           |     |     |     |    |    |    |    |    |    |    |    |
|----------------|-----------|-----|-----|-----|----|----|----|----|----|----|----|----|
| —              | LASr <17% | 112 | 108 | 102 | 88 | 74 | 66 | 53 | 46 | 38 | 35 | 18 |
| —              | LASr ≥17% | 114 | 102 | 92  | 85 | 80 | 67 | 59 | 50 | 45 | 40 | 23 |

**Figure S2.** Kaplan-Meier survival curve for all-cause mortality according to LASr at long-term follow-up.

Time to all-cause mortality according to LASr at long-term follow-up: LASr <17% (median value) (blue) and LASr ≥17% (red).

LASr = left atrial reservoir strain.
